# Supplementary material for: Establishing an accessible data corpus based on evidence to the Victoria Climbié inquiry: Merging user needs and research dimensions
Source: Royal Society of Chemistry journal article supplement (doi:10.1039/d3dt04318e), 2004-01-15
Supplement: d3dt04318e4.pdf [file d3dt04318e4.pdf]

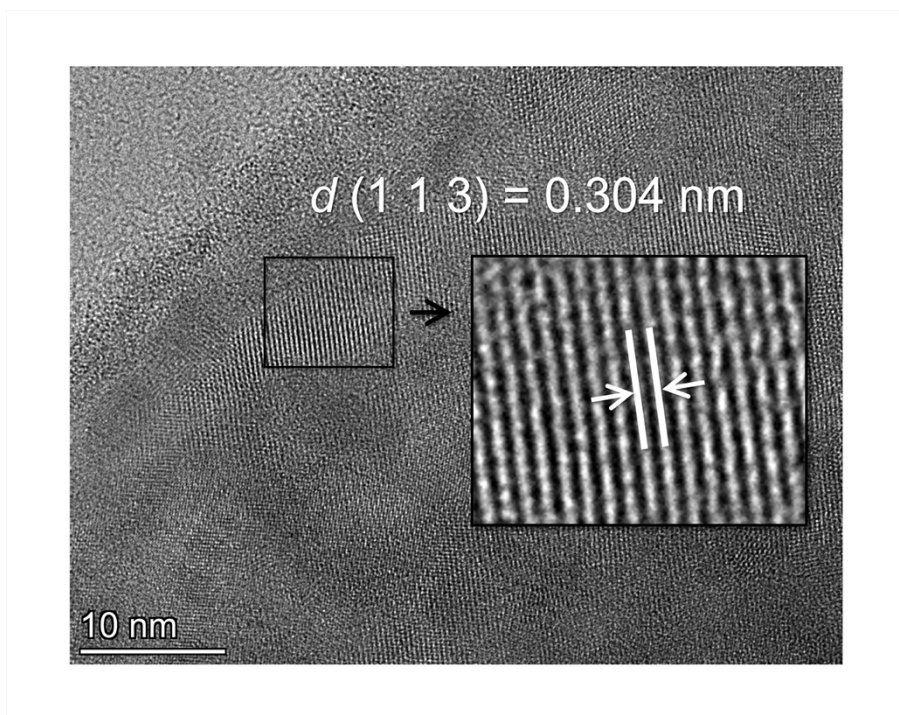

Fig. S1 TEM image of a  $\text{Sr}_3\text{NaSbO}_6:0.002\text{Bi}$  particle.

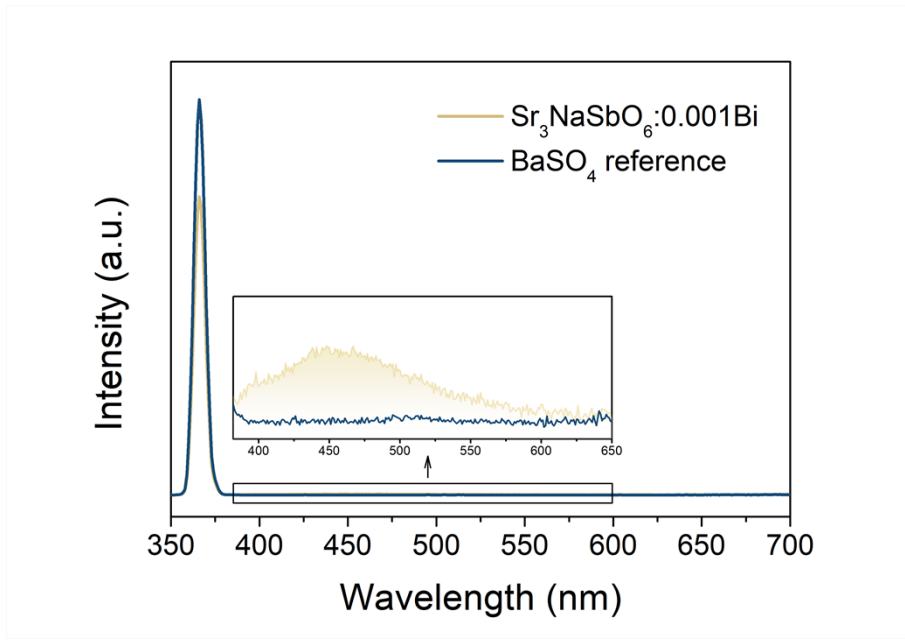

Fig. S2 Excitation line of BaSO<sub>4</sub> and emission spectrum of Sr<sub>3</sub>NaSbO<sub>6</sub>:0.001Bi.

Table S1 The bond distance and bond energy parameters of the central atom in Sr<sub>3</sub>NaSbO<sub>6</sub> with Bi ions in the Sr and Na positions. The unit of bond energy is kcal·mol<sup>-1</sup>.

| Central atom | Coordination atom | d / Å  | E <sub>M-O</sub> | E <sub>Bi-O</sub> | ΔE <sub>Bi</sub> |
|--------------|-------------------|--------|------------------|-------------------|------------------|
| Sr           | O1                | 2.8804 | 8.25             | 5.50              | /                |
|              | O2                | 2.6189 | 16.73            | 11.15             | /                |
|              | O3                | 2.6205 | 16.65            | 11.10             | /                |
|              | O4                | 2.8804 | 8.25             | 5.50              | /                |
|              | O5                | 2.5223 | 21.71            | 14.48             | /                |
|              | O6                | 2.5223 | 21.71            | 14.48             | /                |
|              | O7                | 2.6205 | 16.65            | 11.10             | /                |
|              | O8                | 2.6190 | 16.72            | 11.15             | /                |
| Average      | /                 | /      | 15.83            | 10.56             | 5.27             |
| Na           | O1                | 2.3951 | 21.50            | 10.21             | /                |
|              | O2                | 2.3951 | 21.50            | 10.21             | /                |
|              | O3                | 2.3951 | 21.50            | 10.21             | /                |
|              | O4                | 2.3951 | 21.50            | 10.21             | /                |
|              | O5                | 2.3951 | 21.50            | 10.21             | /                |
|              | O6                | 2.3951 | 21.50            | 10.21             | /                |
| Average      | /                 | /      | 21.50            | 10.21             | 11.29            |

Table S2 The CIE coordinates of Sr<sub>3</sub>NaSbO<sub>6</sub>:0.001Bi at different operating temperatures (λ<sub>ex</sub> = 349 nm).

|     | x      | y      |
|-----|--------|--------|
| 298 | 0.1749 | 0.1391 |
| 323 | 0.1757 | 0.1454 |
| 348 | 0.1764 | 0.1475 |
| 373 | 0.1771 | 0.1506 |
| 398 | 0.1789 | 0.1561 |
| 423 | 0.1804 | 0.1597 |
| 448 | 0.1828 | 0.1649 |
| 473 | 0.1866 | 0.1724 |
| 498 | 0.1908 | 0.1793 |
| 523 | 0.1950 | 0.1855 |
| 548 | 0.1981 | 0.1905 |
| 573 | 0.1999 | 0.1938 |
