# Supplementary figures and images for: Establishing an accessible data corpus based on evidence to the Victoria Climbié inquiry: Merging user needs and research dimensions
Source: Royal Society of Chemistry journal article supplement (doi:10.1039/d3dt04318e), 2004-01-15

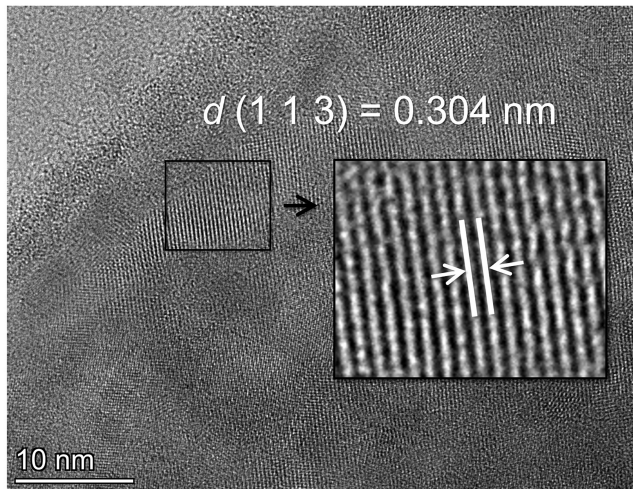

Supplement: d3dt04318e2.pdf [file d3dt04318e2.pdf]

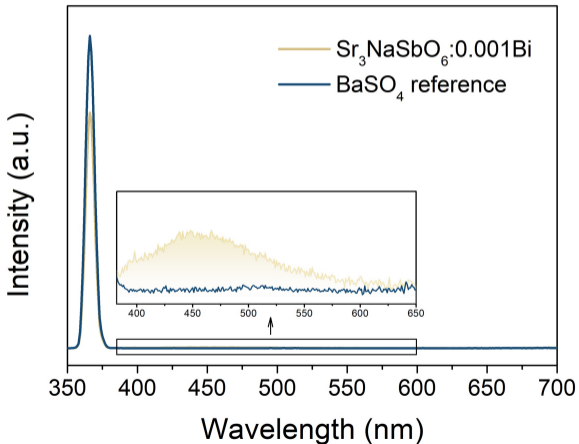

Supplement: d3dt04318e3.pdf [file d3dt04318e3.pdf]
